# Supplementary material for: Shifting Patterns of Aedes aegypti Fine Scale Spatial Clustering in Iquitos, Peru
Source: PubMed Central journal article supplement (PMC4125221; doi:10.1371/journal.pntd.0003038), 2014-08-07

(A)

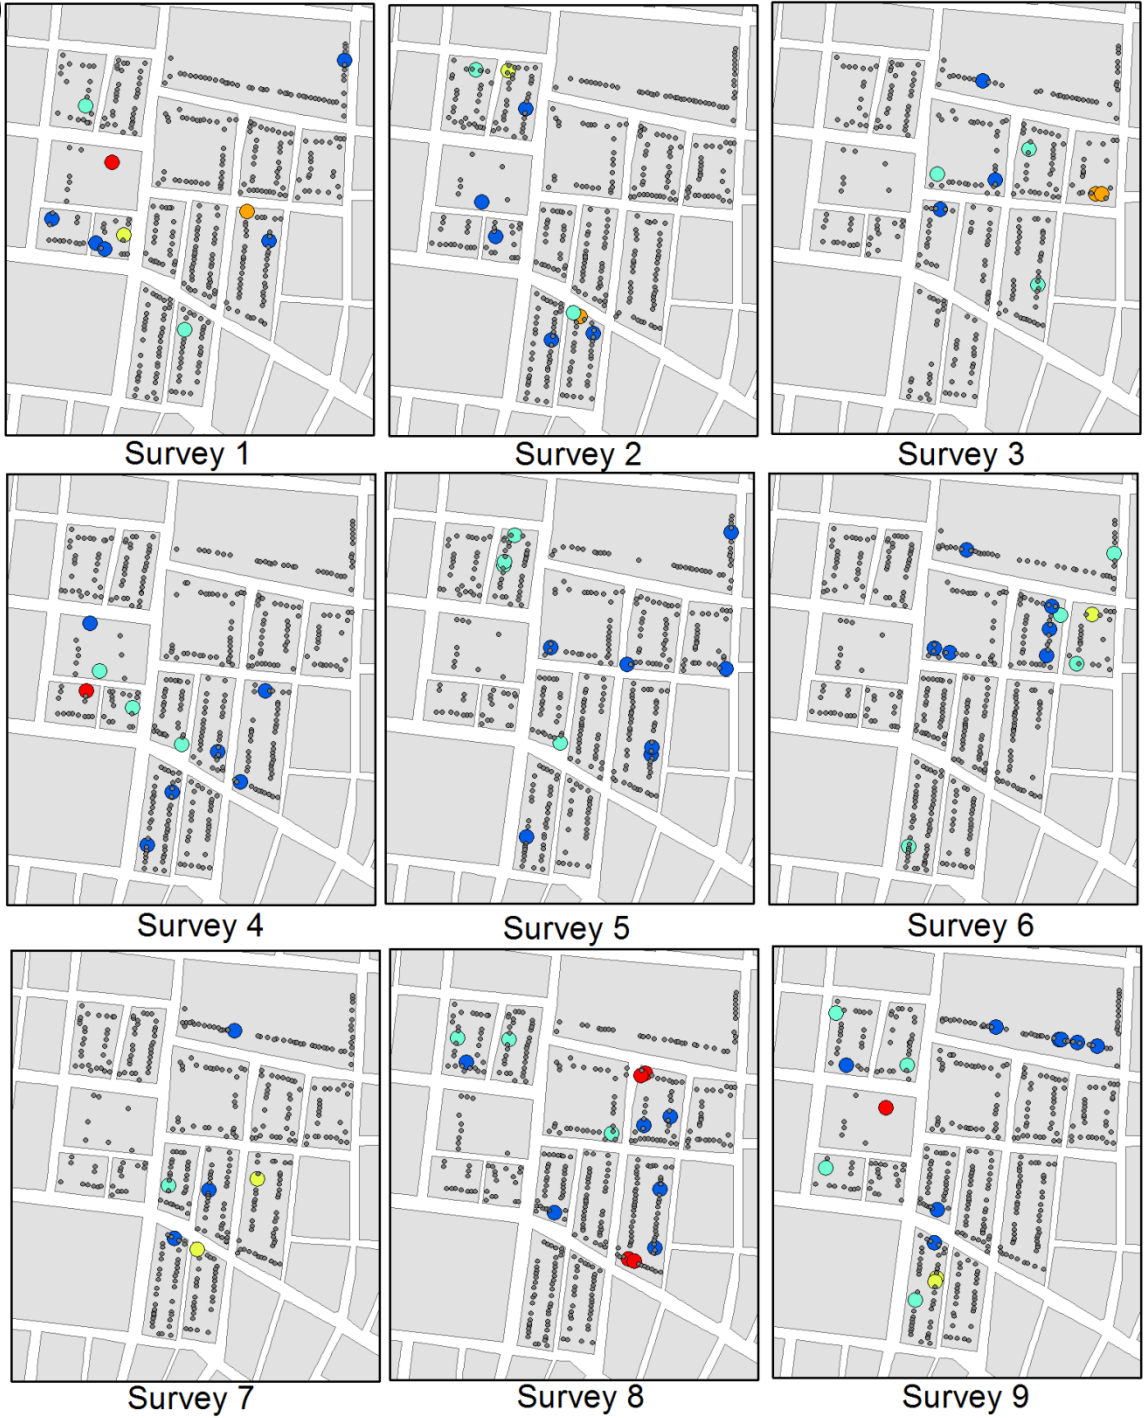

(B)

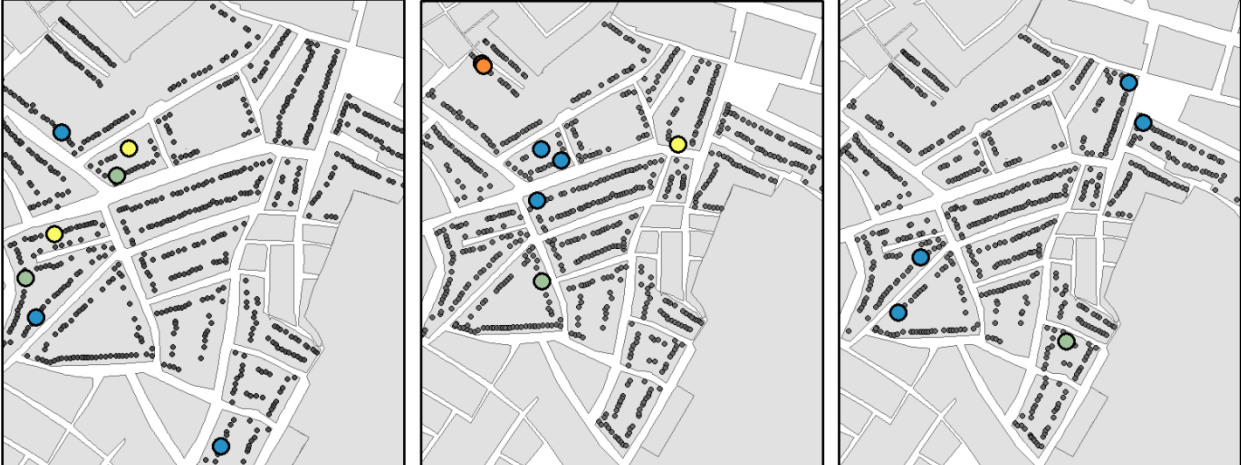

Survey 1

Survey 2

Survey 3

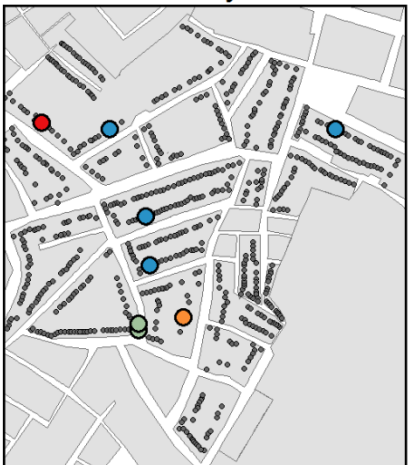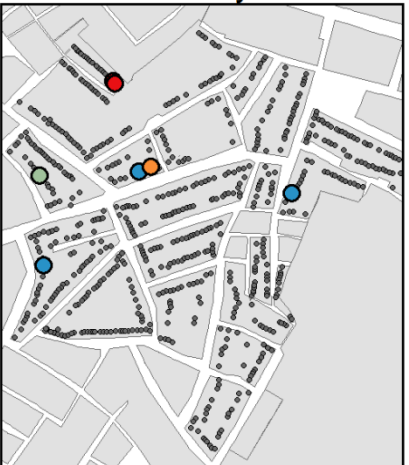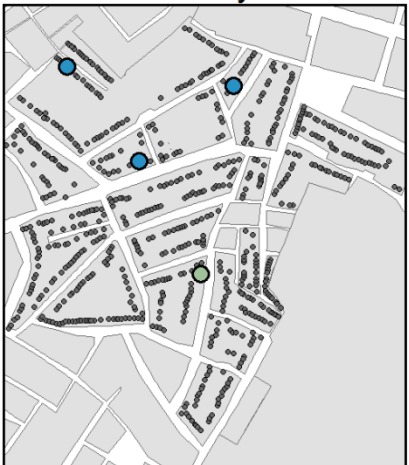

Survey 4

Survey 5

Survey 6

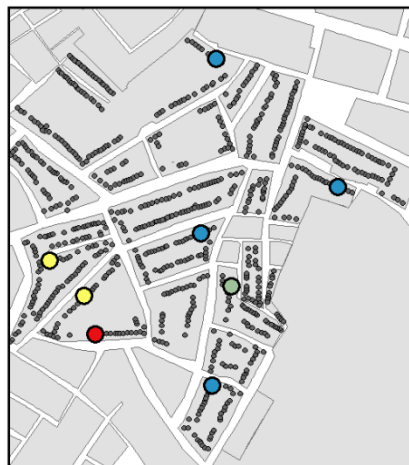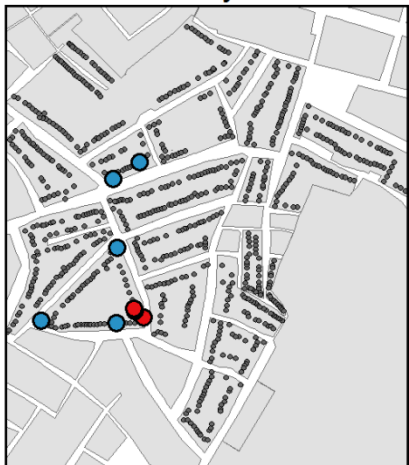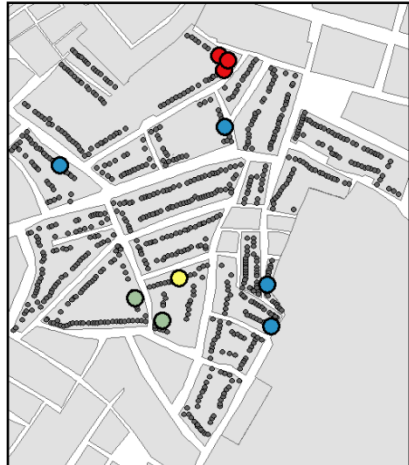

Survey 7

Survey 8

Survey 9

Clustering distance (meters):

- Not significant
- 1
- 10
- 20
- 30
- >30

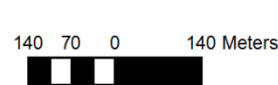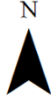

Supplement: pntd.0003038.s004.pdf [file pntd.0003038.s004.pdf]
