# Supplementary material for: Shifting Patterns of Aedes aegypti Fine Scale Spatial Clustering in Iquitos, Peru
Source: PubMed Central journal article supplement (PMC4125221; doi:10.1371/journal.pntd.0003038), 2014-08-07

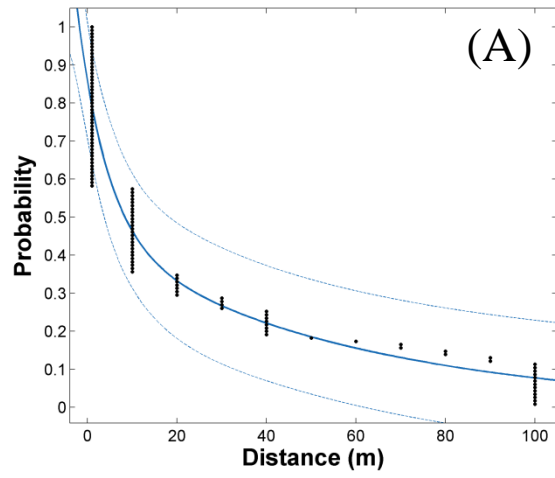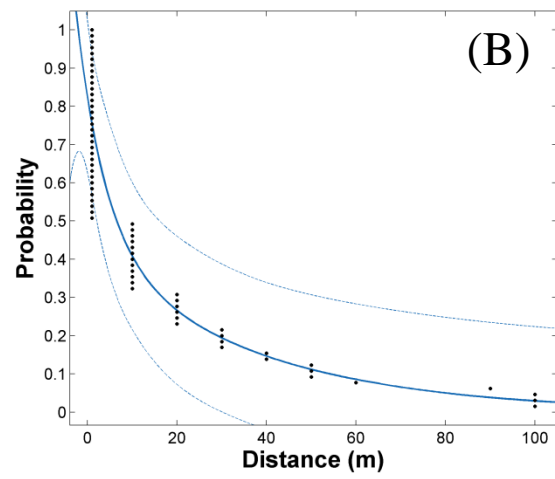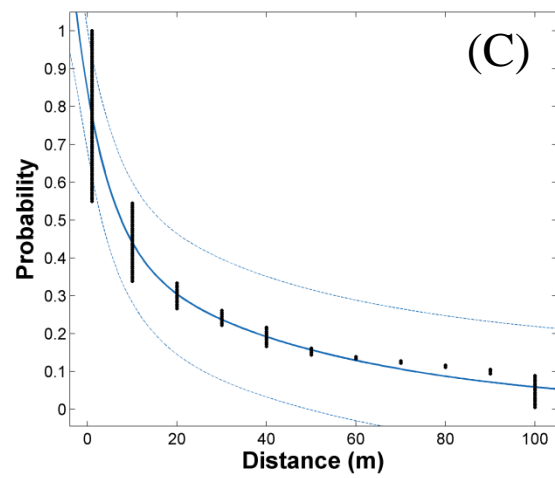

Supplement: pntd.0003038.s005.pdf [file pntd.0003038.s005.pdf]
